# Supplementary material for: Wogonin alleviates liver injury in sepsis through Nrf2‐mediated NF‐κB signalling suppression
Source: PubMed Central journal article supplement (PMC8184690; doi:10.1111/jcmm.16604), 2021-05-12

### A Nrf2

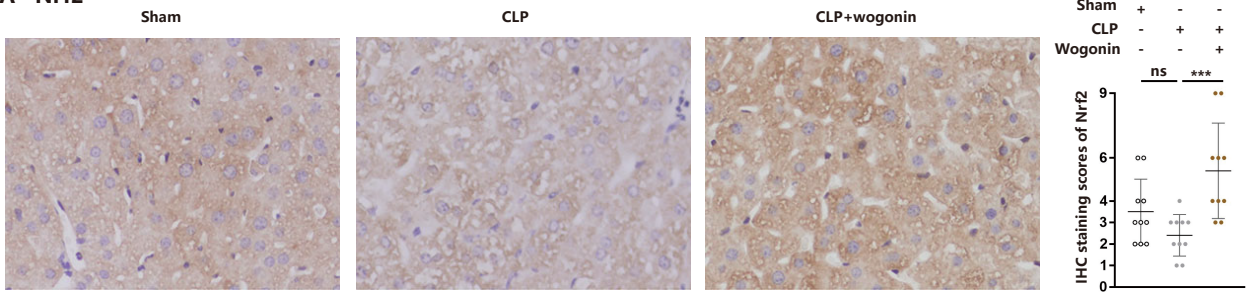

### B HO-1

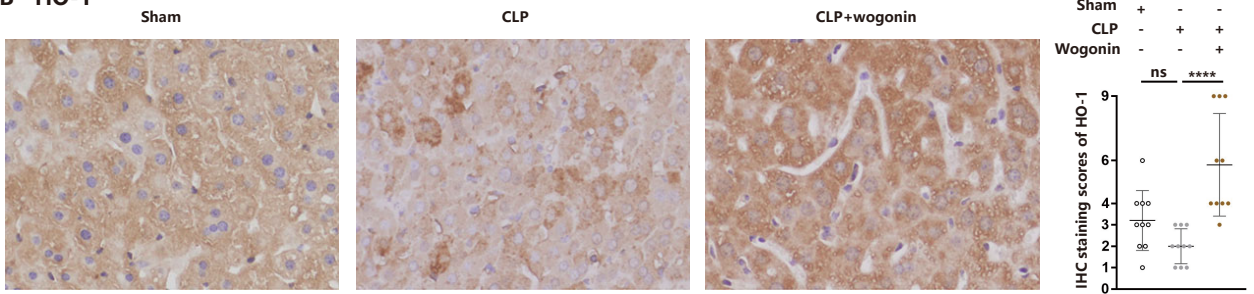

### C SOD1

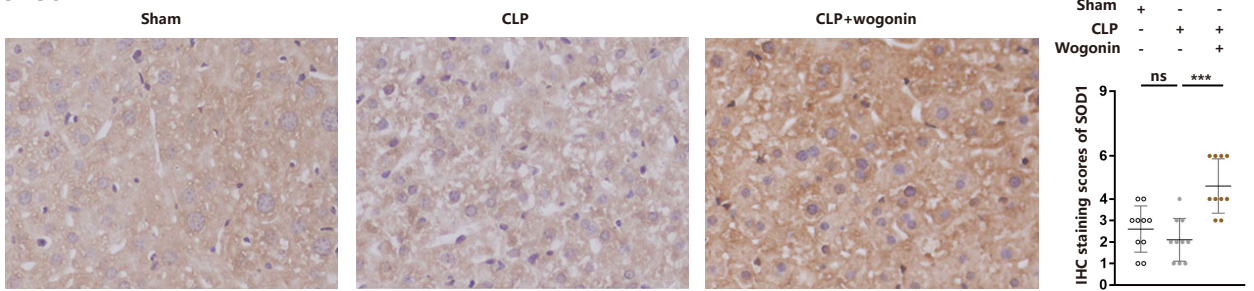

### D SOD2

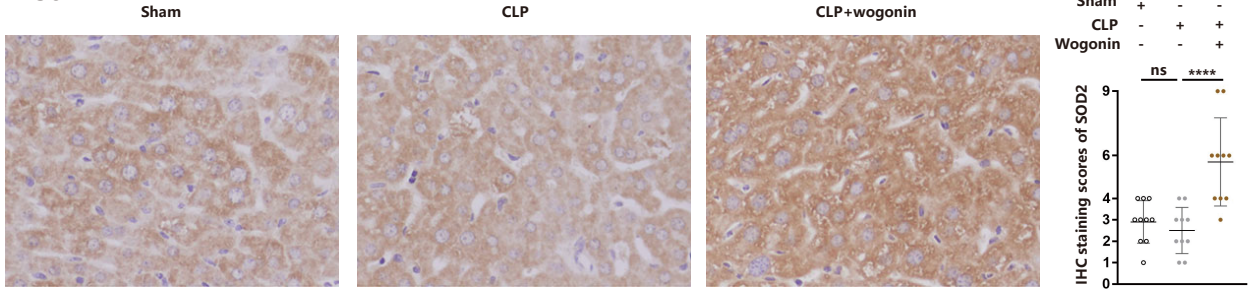

### E p-p65 (Ser536)

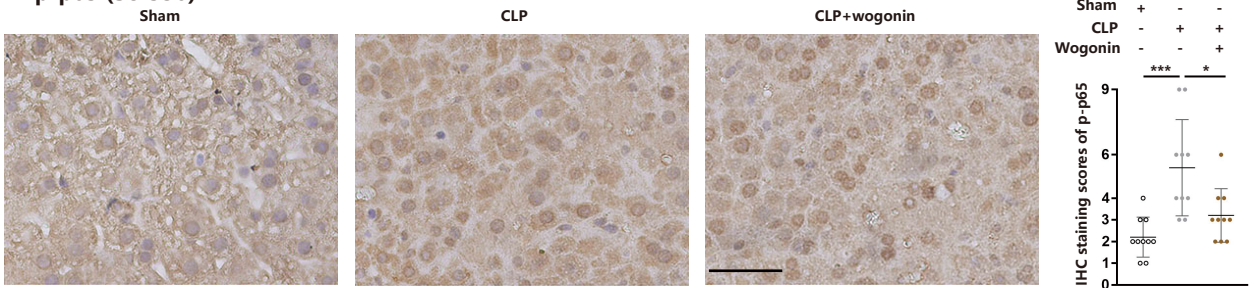

Supplement: JCMM-25-5782-s002.pdf [file JCMM-25-5782-s002.pdf]
