# Supplementary material for: Wogonin alleviates liver injury in sepsis through Nrf2‐mediated NF‐κB signalling suppression
Source: PubMed Central journal article supplement (PMC8184690; doi:10.1111/jcmm.16604), 2021-05-12

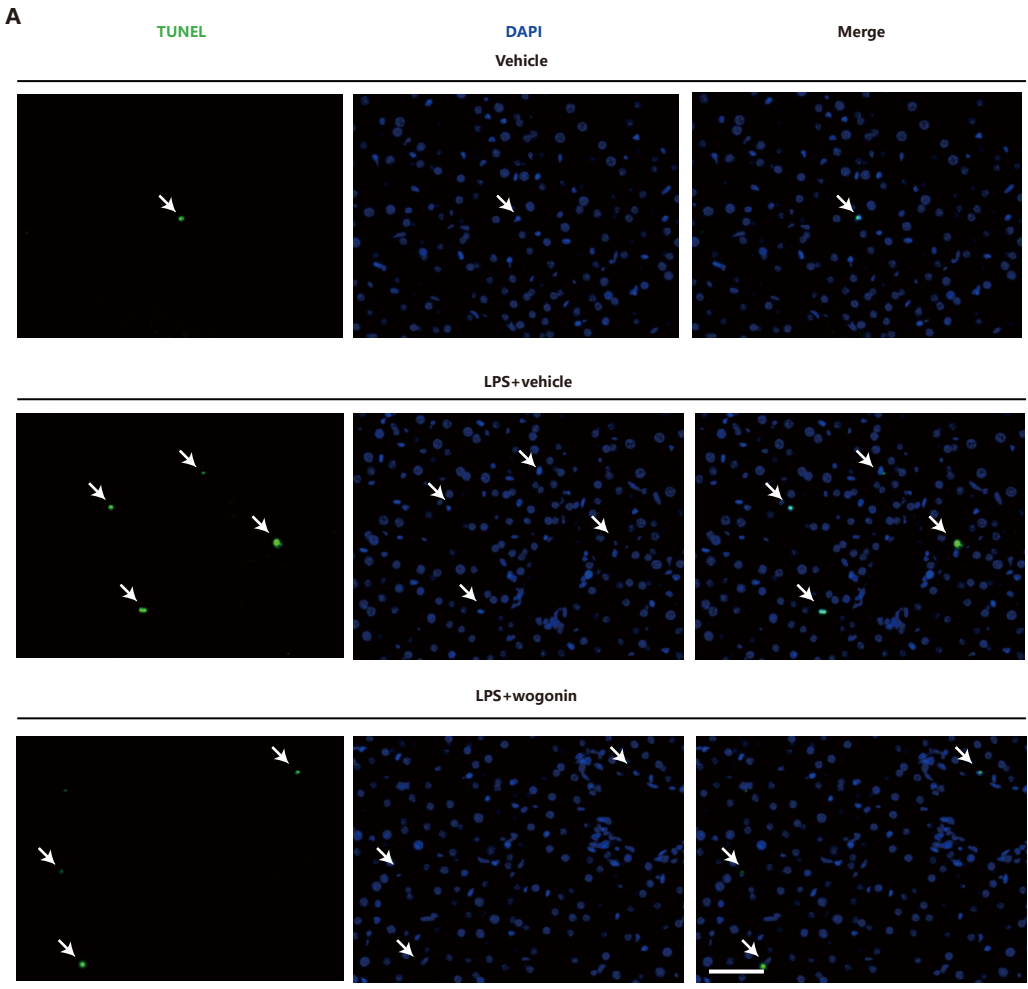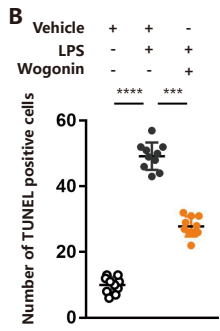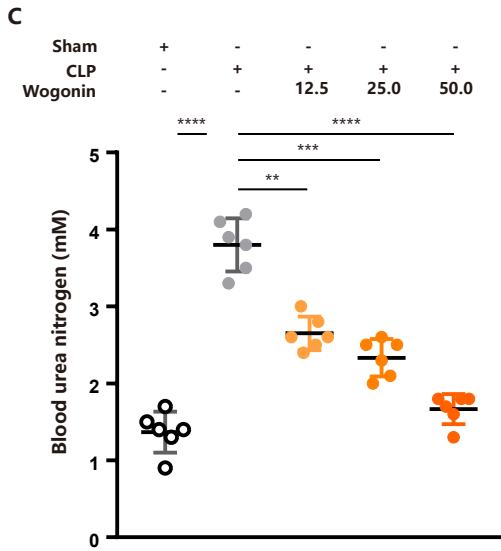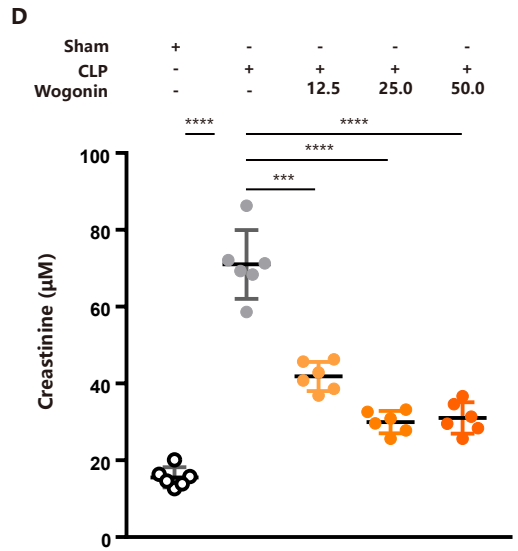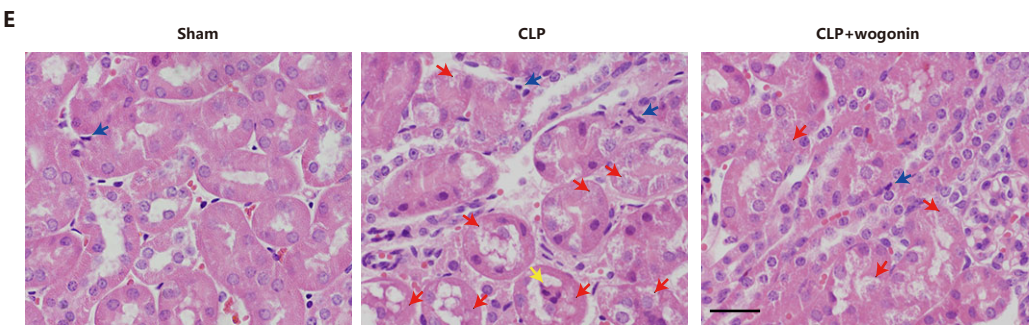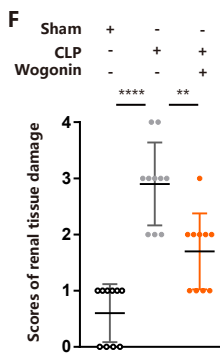

Supplement: JCMM-25-5782-s004.pdf [file JCMM-25-5782-s004.pdf]
